# Supplementary material
Source: publisher figshare collection journal article supplement (https://tandf.figshare.com/ndownloader/files/16832456)
Supplement: Supplementary file 1 [file 16832456]

**Supplementary material**

**Interview questions**

The interview was conducted in Chinese. Hereby the interview guides in Chinese and English translation are both listed.

*Chinese version*

介绍

您好！非常感谢您能抽空来参加我们这个访谈。今天主要想跟您谈谈对我们中国生物医学领域学术道德规范的认识。这是我们大课题的一部分，之前我们组研究了欧洲的学术道德问题，对目前情况有了更好的认识，同时也提出了一些针对性的建议。因此，现在我们想了解下中国的情况，想看看在这个基础上能够如何进一步改善国内的学术道德。

（解释并签署知情同意书）

您还有其他问题吗？

我们现在可以开始吗？

0.基础信息

请问您之前在国内的什么单位从事研究？

您主要的研究领域是？

您能说说是什么让您决定来欧洲？

为什么从事科研？

1.定义

您有没有听过“学术道德/科研道德/科研诚信/学术不端”这样的概念？什么时候，在哪里？

您是如何理解这些概念的呢？+ 行为打分、排序

如果您认为学术道德非常重要，能说说为什么吗？（学术不端的后果）

2a. 经历

就您之前描述的行为，您有没有经历过？自己的或者别人的？当时是什么情况？

您有没有经历过这样一些时候，觉得可能不遵守学术规范会容易很多，比如加工下数据啊，编造些记录啊？能具体说说吗？

2b. 您对这些行为有什么看法？

3. 相关因素

您觉得是什么原因导致学术不端?

有些研究表明尤其是在医学领域的学术道德问题可能更让人担忧，研究结果可能更加有偏倚。您赞同吗？您能想象可能是什么样的一些因素导致这个现象吗？

4. 保障措施

据你所知，国内采取了什么措施保障学术道德？学校层面或者其他？

欧洲呢？

5. 中欧差异

你在欧洲X年了，你觉得在这里做科研感觉如何？

和国内相比，你观察到有什么不同，包括学术环境、培训或其他任何方面？

6. 建议

您觉得有哪些措施能够帮忙改善国内目前在生物医学领域的学术道德情况？

结束语

除了以上这些，您还有什么想要补充的吗？

接下来几个月我可能会分析所有访谈对象的访谈内容，如果您感兴趣的话，等我们的研究成果发表的时候，我可以给您发一份。

那我们访谈就到这结束。

再次感谢您!

*English version*

**Introduction**

I would like to thank you for taking the time to meet me. Today I’d like to talk to you about your perception of research integrity in Chinese biomedical domain, as a part of our broader program. Our research team have studied research integrity in Europe and found it very helpful to know the European situation and promote research integrity here. Therefore, we’re interested in Chinese situation and we’d like to know how we could further promote research integrity in China.

(To explain and sign the informed consent form)

We have signed the informed consent form. Do you have any other questions?

Can we start now?

**0. Basic information**

a. Which Chinese institution did you do research in, when?

b. And what was & is your research domain?

c. Could you tell me what made you come here?

d. What’s your **motivation** to do research?

**Part I-definitions of research integrity and misconduct**

Have you heard “research integrity/misconduct/…”? When? Where?

How do you understand these concepts? + SCORING (severity & prevalence)

If you find research integrity important, why? (consequences of research misconduct)

**Part II-attitudes & responses towards research integrity and misconduct, especially in biomedical domains**

a. experience

Do you have any experience with the behaviors above? Could you describe it?

Have you experienced such moments when you have the idea that “research misconduct could make things easier?” Could you describe it?

b. opinion

What is your opinion towards it?

**Part III- factors contributing to research misconduct in Chinese biomedical research**

What do you think contribute to research misconduct?

There’re studies showing that especially in medicine, to produce “publishable” results, research is biased. Would you agree with that? What factors could you imagine make that phenomenon?

**Part IV-measures taken to promote research integrity (in both China and Europe)**

As you know, what measures have been take to promote research integrity or prevent research misconduct in China?

And Europe?

**Part V-differences between China and Europe**

Since you have been here for X years, how do you find your research life here?

What differences have you noticed between China and Europe, with regards to the research culture, training or anything else?

**Part VI-suggestions to promote biomedical research integrity in China**

What measures do you think could be helpful to promote biomedical research integrity in China?

**Closing**

Is there anything more you’d like to add?

I’m going to analyze the information from you and some other participants in the next several months. I’ll be happy to send you a copy when our interview result gets published, if you are interested.

Thank you very much for your time!
